# Supplementary material
Source: Springer Nature journal article supplement (https://www.springermedizin.de/resource/supplementary/12881_2013_1159_MOESM2_ESM.pdf/9452104)
Supplement: MOESM2 [file 9452104]

**Table S2 - Genotype distributions of single nucleotide polymorphisms in *SFTPD* gene – German vs Japanese –**

|                  |       | <b>Genotype distributions</b> |                |                |
|------------------|-------|-------------------------------|----------------|----------------|
| <b>rs721917</b>  | total | C/C                           | T/C            | T/T            |
| German           | 139   | 34<br>(24.5%)                 | 58<br>(41.7%)  | 47<br>(33.8%)  |
| Japanese         | 338   | 114<br>(33.7%)                | 166<br>(49.1%) | 58<br>(17.2%)  |
| Chi-square test  |       |                               |                | $p < 0.001$    |
| <b>rs1998374</b> | total | C/C                           | T/C            | T/T            |
| German           | 139   | 3<br>(2.2%)                   | 23<br>(16.5%)  | 113<br>(81.3%) |
| Japanese         | 338   | 63<br>(18.7%)                 | 160<br>(47.3%) | 115<br>(34.0%) |
| Chi-square test  |       |                               |                | $p < 0.001$    |
| <b>rs2243639</b> | total | C/C                           | T/C            | T/T            |
| German           | 139   | 56<br>(40.3%)                 | 60<br>(43.2%)  | 23<br>(16.5%)  |
| Japanese         | 338   | 168<br>(49.7%)                | 141<br>(41.7%) | 29<br>(8.6%)   |
| Chi-square test  |       |                               |                | $p = 0.022$    |
| <b>rs3088308</b> | total | A/A                           | A/T            | T/T            |
| German           | 139   | 118<br>(84.9%)                | 21<br>(15.1%)  | 0<br>(0.0%)    |
| Japanese         | 338   | 324<br>(95.9%)                | 14<br>(4.1%)   | 0<br>(0.0%)    |

Each of German and Japanese cohorts includes both patients and healthy subjects.
